# Supplementary material for: Comparison between Multiple Doses and Single-Dose Steroids in Preventing the Incidence of Reintubation after Extubation among Critically Ill Patients: A Network Meta-Analysis
Source: MDPI journal article supplement (doi:10.3390/jcm10132900), 2021-06-29

# **Supplementary materials**

**Table S1. GRADE of each comparison**

**Table S2. Search strategy**

**Table S3. Glucocorticoid equivalents**

**Figure S1. Risk of bias of included studies**

**Figure S2. Network map**

**Figure S3. Forest plot of each comparison**

**Figure S4. The inconsistency test at the global and local levels.**

**Figure S5. Funnel plot of included studies**

**Table S1. GRADE of each comparison**

## Multiple doses compared to Placebo for Reintubation

Bibliography:

| Certainty assessment                          |                    |                   |                  |                 |                      |                                        | Summary of findings      |                               |                                       |                                    |                                                      |
|-----------------------------------------------|--------------------|-------------------|------------------|-----------------|----------------------|----------------------------------------|--------------------------|-------------------------------|---------------------------------------|------------------------------------|------------------------------------------------------|
| Participa<br>nts<br>(studies)<br>Follow<br>up | Risk<br>of<br>bias | Inconsiste<br>ncy | Indirectn<br>ess | Imprecis<br>ion | Publicati<br>on bias | Overall<br>certainty<br>of<br>evidence | Study event<br>rates (%) |                               | Relati<br>ve<br>effect<br>(95%<br>CI) | Anticipated<br>absolute<br>effects |                                                      |
|                                               |                    |                   |                  |                 |                      |                                        | With<br>Place<br>bo      | With<br>Multi<br>ple<br>doses |                                       | Risk<br>with<br>Place<br>bo        | Risk<br>differen<br>ce with<br>Multipl<br>e<br>doses |

### Reintubation\_ Multiple doses vs Placebo

|                  |                    |             |                |                |      |                  |                      |                          |                                            |                 |                                                                                  |
|------------------|--------------------|-------------|----------------|----------------|------|------------------|----------------------|--------------------------|--------------------------------------------|-----------------|----------------------------------------------------------------------------------|
| 1191<br>(6 RCTs) | not<br>serio<br>us | not serious | not<br>serious | not<br>serious | none | ⊕⊕⊕<br>⊕<br>HIGH | 49/56<br>8<br>(8.6%) | 23/62<br>3<br>(3.7%<br>) | <b>OR<br/>0.43</b><br>(0.25<br>to<br>0.72) | 86 per<br>1,000 | <b>47<br/>fewer<br/>per<br/>1,000</b><br>(from<br>63<br>fewer to<br>23<br>fewer) |
|------------------|--------------------|-------------|----------------|----------------|------|------------------|----------------------|--------------------------|--------------------------------------------|-----------------|----------------------------------------------------------------------------------|

### Reintubation\_ Single dose vs Placebo

|                  |                    |             |                |                |      |                  |                      |                     |                                            |                 |                                                                                  |
|------------------|--------------------|-------------|----------------|----------------|------|------------------|----------------------|---------------------|--------------------------------------------|-----------------|----------------------------------------------------------------------------------|
| 1003<br>(5 RCTs) | not<br>serio<br>us | not serious | not<br>serious | not<br>serious | none | ⊕⊕⊕<br>⊕<br>HIGH | 26/50<br>4<br>(5.2%) | 9/499<br>(1.8%<br>) | <b>OR<br/>0.31</b><br>(0.14<br>to<br>0.69) | 52 per<br>1,000 | <b>35<br/>fewer<br/>per<br/>1,000</b><br>(from<br>44<br>fewer to<br>15<br>fewer) |
|------------------|--------------------|-------------|----------------|----------------|------|------------------|----------------------|---------------------|--------------------------------------------|-----------------|----------------------------------------------------------------------------------|

### Reintubation\_ Multiple doses vs Single dose

|                 |                    |             |                |         |      |                      |                |                    |                                            |                 |                                                                            |
|-----------------|--------------------|-------------|----------------|---------|------|----------------------|----------------|--------------------|--------------------------------------------|-----------------|----------------------------------------------------------------------------|
| 194<br>(2 RCTs) | not<br>serio<br>us | not serious | not<br>serious | serious | none | ⊕⊕⊕○<br>MODER<br>ATE | 4/95<br>(4.2%) | 5/99<br>(5.1%<br>) | <b>OR<br/>1.22</b><br>(0.32<br>to<br>4.74) | 42 per<br>1,000 | <b>9 more<br/>per<br/>1,000</b><br>(from<br>28<br>fewer to<br>130<br>more) |
|-----------------|--------------------|-------------|----------------|---------|------|----------------------|----------------|--------------------|--------------------------------------------|-----------------|----------------------------------------------------------------------------|

**Table S2. Search strategy**

| Database | Search                                                                                                                                                                                                                                                                                                                                                                                                                                                                                                                                                                                                                                                                                                                                                                                                                                                                                                                                                                                                                                                                                                                                                                                                                                                                                                                                                                                                                                                                                                                                                                                                                                                                                                                                                                       | Studies |
|----------|------------------------------------------------------------------------------------------------------------------------------------------------------------------------------------------------------------------------------------------------------------------------------------------------------------------------------------------------------------------------------------------------------------------------------------------------------------------------------------------------------------------------------------------------------------------------------------------------------------------------------------------------------------------------------------------------------------------------------------------------------------------------------------------------------------------------------------------------------------------------------------------------------------------------------------------------------------------------------------------------------------------------------------------------------------------------------------------------------------------------------------------------------------------------------------------------------------------------------------------------------------------------------------------------------------------------------------------------------------------------------------------------------------------------------------------------------------------------------------------------------------------------------------------------------------------------------------------------------------------------------------------------------------------------------------------------------------------------------------------------------------------------------|---------|
| Medline  | <p>#1. Intubation [MeSH Terms] OR Intubation, Intratracheal [MeSH Terms] OR intubation.ti,ab,kw (74,313)</p> <p>#2. Airway Extubation [MeSH Terms] OR extubation.ti,ab,kw (9,774)</p> <p>#3. Airway Obstruction [MeSH Terms] OR airway obstruction (32,349)</p> <p>#4. stridor*.ti,ab,kw (3,778)</p> <p>#5. (larynx*.ti,ab,kw AND edema*.ti,ab,kw) OR laryngeal edema.ti,ab,kw (1,777)</p> <p>#6. or/1-5 (112,118)</p> <p>#7. Adrenal Cortex Hormones [MeSH Terms] OR Steroids [MeSH Terms] Glucocorticoids [MeSH Terms] OR steroid*.ti,ab,kw OR corticosteroid*.ti,ab,kw OR glucocorticoid*.ti,ab,kw (1,060,038)</p> <p>#8. Prednisone [MeSH Terms] OR prednisone*.ti,ab,kw (51,185)</p> <p>#9. Prednisolone [MeSH Terms] OR prednisolone*.ti,ab,kw (60,562)</p> <p>#10. Methylprednisolone [MeSH Terms] OR methylprednisolone*.ti,ab,kw (25,032)</p> <p>#11. Dexamethasone [MeSH Terms] OR dexamethasone*.ti,ab,kw (68,065)</p> <p>#12. Cortisone [MeSH Terms] OR cortisone*.ti,ab,kw (23,124)</p> <p>#13. Hydrocortisone [MeSH Terms] OR hydrocortisone*.ti,ab,kw (75,757)</p> <p>#14. Budesonide [MeSH Terms] OR budesonide*.ti,ab,kw (5,839)</p> <p>#15. Fluticasone [MeSH Terms] OR fluticasone*.ti,ab,kw (4,299)</p> <p>#16. ciclesonide*.ti,ab,kw (336)</p> <p>#17. Triamcinolone [MeSH Terms] OR triamcinolone*.ti,ab,kw (11,165)</p> <p>#18. Beclomethasone [MeSH Terms] OR beclomethasone*.ti,ab,kw (3,743)</p> <p>#19. flunisolide*.ti,ab,kw (309)</p> <p>#20. mometasone*.ti,ab,kw (10)</p> <p>#21. or/7-20 (1,095,201)</p> <p>#22. Randomized controlled trial.pt OR controlled clinical trial.pt OR randomized.ti,ab OR placebo.ti,ab OR drug therapy.sh OR randomly.ti,ab OR trial.ti,ab OR groups.ti,ab (2,797,200)</p> <p>#23. 6 AND 21 AND 22 (1,914)</p> | 1,914   |
| Embase   | <p>#1. Endotracheal Intubation [E] OR Intubation [E] OR intubation.ti,ab,kw (100,387)</p> <p>#2. Extubation [E] OR extubation.ti,ab,kw (21,364)</p> <p>#3. Airway Obstruction [E] OR airway obstruction (42,647)</p> <p>#4. Stridor [E] OR stridor.ti,ab,kw (8,768)</p> <p>#5. (larynx*.ti,ab,kw AND edema*.ti,ab,kw) OR laryngeal edema.ti,ab,kw (2,750)</p> <p>#6. or/1-5 (158,209)</p> <p>#7. Corticosteroid [E] OR Steroid [E] OR Glucocorticoid [E] OR steroid*.ti,ab,kw OR corticosteroid*.ti,ab,kw OR glucocorticoid*.ti,ab,kw (1,485,027)</p> <p>#8. Prednisone [E] OR prednisone*.ti,ab,kw (164,062)</p> <p>#9. Prednisolone [E] OR prednisolone*.ti,ab,kw (122,080)</p> <p>#10. Methylprednisolone [E] OR methylprednisolone*.ti,ab,kw (90,720)</p> <p>#11. Dexamethasone [E] OR dexamethasone*.ti,ab,kw (148,354)</p> <p>#12. Cortisone [E] OR cortisone*.ti,ab,kw (15,302)</p> <p>#13. Hydrocortisone [E] OR hydrocortisone*.ti,ab,kw (119,640)</p> <p>#14. Budesonide [E] OR budesonide*.ti,ab,kw (20,529)</p> <p>#15. Fluticasone [E] OR fluticasone*.ti,ab,kw (11,754)</p> <p>#16. Ciclesonide [E] OR ciclesonide*.ti,ab,kw (1,484)</p> <p>#17. Triamcinolone [E] OR triamcinolone*.ti,ab,kw (18,778)</p> <p>#18. Beclomethasone [E] OR beclomethasone*.ti,ab,kw (9,534)</p> <p>#19. Flunisolide [E] OR flunisolide*.ti,ab,kw (2,411)</p> <p>#20. Mometasone Furoate [E] OR mometasone*.ti,ab,kw (4,552)</p> <p>#21. or/7-20 (589,724)</p> <p>#22. randomized.ti,ab OR placebo.ti,ab OR drug therapy.sh OR</p>                                                                                                                                                                                                                                                | 1,844   |

|                  |                                                                                                                                                                                                                                                                                                                                                                                                                                                                                                                                                                                                       |       |
|------------------|-------------------------------------------------------------------------------------------------------------------------------------------------------------------------------------------------------------------------------------------------------------------------------------------------------------------------------------------------------------------------------------------------------------------------------------------------------------------------------------------------------------------------------------------------------------------------------------------------------|-------|
|                  | randomly.ti,ab OR trial.ti,ab OR groups.ti,ab (4,051,545)<br>#23. 6 AND 21 AND 22 (1,844)                                                                                                                                                                                                                                                                                                                                                                                                                                                                                                             |       |
| Cochrane library | #1. Intubation [MeSH] OR Intubation,Intratracheal [MeSH] OR intubation OR Airway Extubation [MeSH] OR extubation OR Airway Obstruction [MeSH] OR airway obastruction OR stridor OR laryngeal edema (18,732)<br><br>#2. Adrenal Cortex Hormones [MeSH] OR Steroids [MeSH] OR Glucocorticoids [MeSH] OR steroid OR corticosteroid OR glucocorticoid OR prednisone OR prednisolone OR methylprednisolone OR dexamethasone OR cortisone OR hydrocortisone OR budesonide OR fluticasone OR ciclesonide OR triamcinolone OR beclomethasone OR flunisolide OR mometasone (88,274)<br><br>#3. 1 AND 2 (1,871) | 1,871 |
| Total            |                                                                                                                                                                                                                                                                                                                                                                                                                                                                                                                                                                                                       | 5,629 |

**Table S3. Glucocorticoid equivalents**

| <b>Glucocorticoid</b> | <b>Dose equivalent</b> |
|-----------------------|------------------------|
| <b>Hydrocortisone</b> | <b>100 mg</b>          |
| Prednisone            | 25 mg                  |
| Prednisolone          | 25 mg                  |
| Triamcinolone         | 20 mg                  |
| Methylprednisolone    | 20 mg                  |
| Betamethasone         | 4 mg                   |
| Dexamethasone         | 4 mg                   |

Figure S1. Risk of bias of included studies

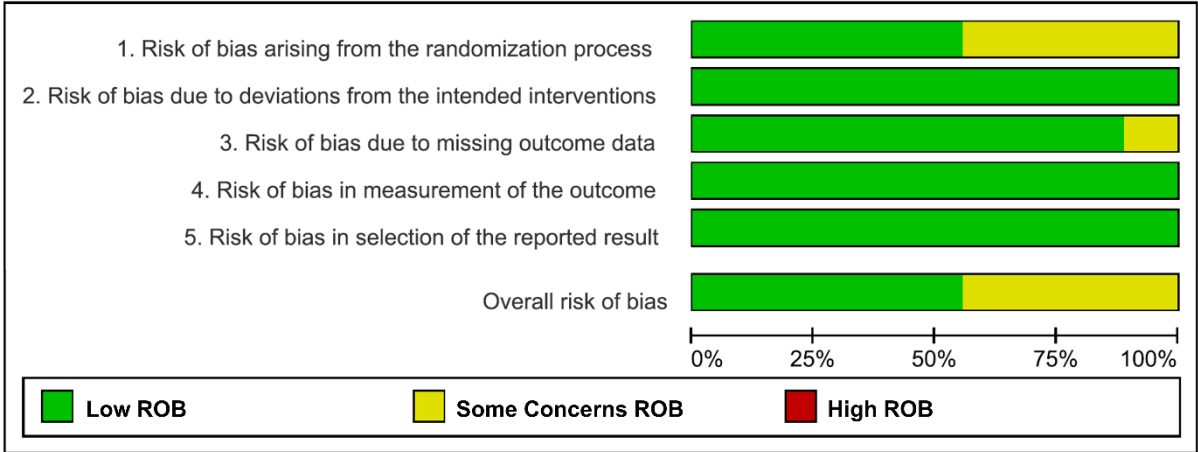

|               | 1. Risk of bias arising from the randomization process | 2. Risk of bias due to deviations from the intended interventions | 3. Risk of bias due to missing outcome data | 4. Risk of bias in measurement of the outcome | 5. Risk of bias in selection of the reported result | Overall risk of bias |
|---------------|--------------------------------------------------------|-------------------------------------------------------------------|---------------------------------------------|-----------------------------------------------|-----------------------------------------------------|----------------------|
| Baloch 2010   | ?                                                      | +                                                                 | ?                                           | +                                             | +                                                   | ?                    |
| Cheng 2006    | +                                                      | +                                                                 | +                                           | +                                             | +                                                   | +                    |
| Cheng 2011    | +                                                      | +                                                                 | +                                           | +                                             | +                                                   | +                    |
| Darmon 1992   | +                                                      | +                                                                 | +                                           | +                                             | +                                                   | +                    |
| Francois 2007 | +                                                      | +                                                                 | +                                           | +                                             | +                                                   | +                    |
| Ho 1996       | ?                                                      | +                                                                 | +                                           | +                                             | +                                                   | ?                    |
| Lee 2007      | +                                                      | +                                                                 | +                                           | +                                             | +                                                   | +                    |
| Lin 2016      | ?                                                      | +                                                                 | +                                           | +                                             | +                                                   | ?                    |
| Yu 2014       | ?                                                      | +                                                                 | +                                           | +                                             | +                                                   | ?                    |

Low ROB  
Some Concerns ROB  
High ROB

**Figure S2. Network map**

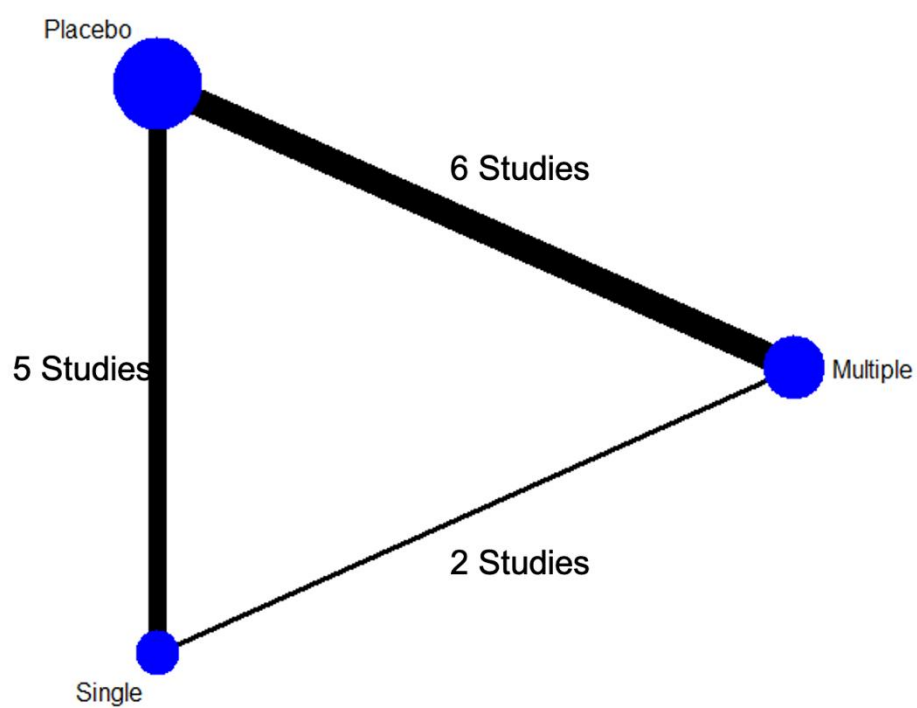

**Figure S3. Forest plot of each comparison**

*1. Multiple doses vs Placebo*

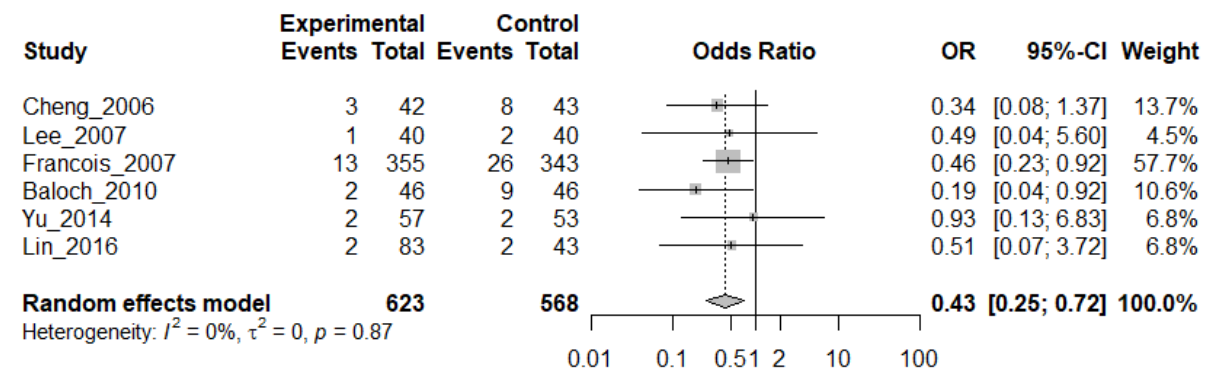

*2. Single dose vs Placebo*

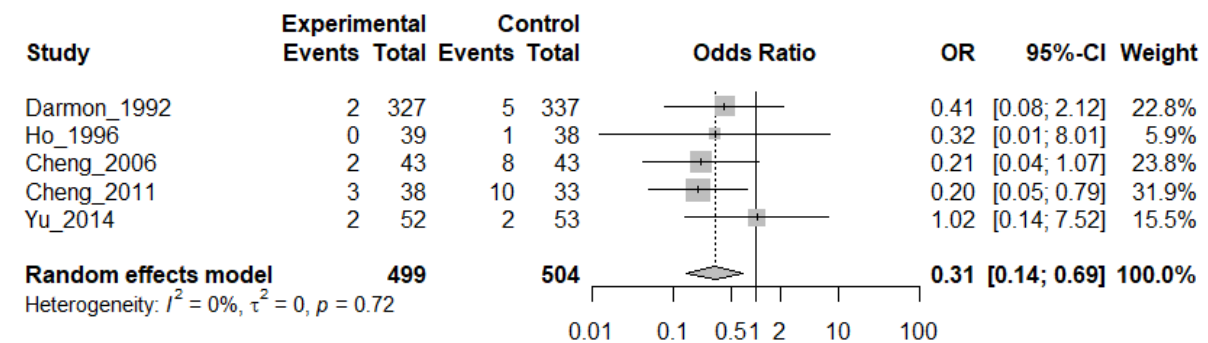

*3. Multiple doses vs Single dose*

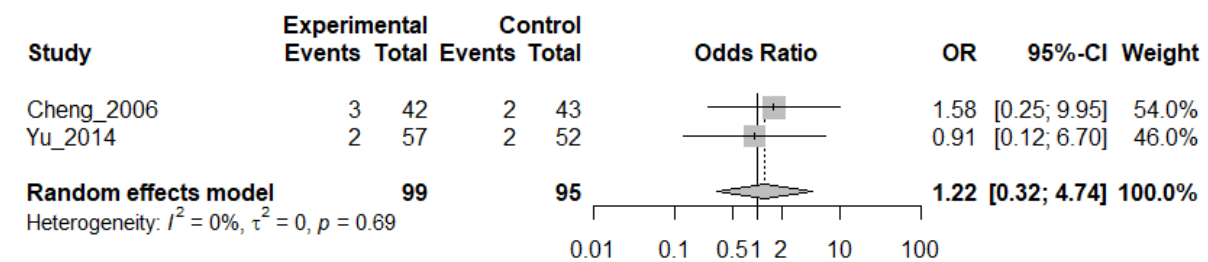



**Figure S4. The inconsistency test at the global and local levels.**

### 1. Global approach

```

3 . network meta i, eform
   Command is: mvmeta _y _S , eform bscovariance(exch 0.5) longparm suppress(uv mm
> ) eq(_y_A: des_ABC, _y_C: des_BC) vars(_y_A _y_C)
Note: using method reml
Note: regressing _y_A on des_ABC
Note: regressing _y_C on des_BC
Note: 9 observations on 2 variables
Note: variance-covariance matrix is proportional to .5*I(2)+.5*J(2,2,1)

initial:      log likelihood = -11.141144
rescale:      log likelihood = -11.141144
rescale eq:   log likelihood = -9.3084664
Iteration 0:   log likelihood = -9.3084664
Iteration 1:   log likelihood = -9.2256785
Iteration 2:   log likelihood = -9.2256784

Multivariate meta-analysis
Variance-covariance matrix = proportional .5*I(2)+.5*J(2,2,1)
Method = reml                               Number of dimensions = 2
Restricted log likelihood = -9.2256784          Number of observations = 9

```

|             | exp(Coef) | Std. Err. | z     | P> z  | [95% Conf. Interval] |          |
|-------------|-----------|-----------|-------|-------|----------------------|----------|
| <b>_y_A</b> |           |           |       |       |                      |          |
| des_ABC     | 1.074003  | .7024869  | 0.11  | 0.913 | .2980225             | 3.870453 |
| _cons       | .4148779  | .1231193  | -2.96 | 0.003 | .2319089             | .7422038 |
| <b>_y_C</b> |           |           |       |       |                      |          |
| des_BC      | .7108566  | .58027    | -0.42 | 0.676 | .143532              | 3.520587 |
| _cons       | .3821459  | .2418653  | -1.52 | 0.129 | .1105331             | 1.321193 |

```

Estimated between-studies SDs and correlation matrix:
      SD      _y_A      _y_C
_y_A 7.964e-12      1      .
_y_C 7.964e-12      .5      1

Testing for inconsistency:
( 1) [_y_A]des_ABC = 0
( 2) [_y_C]des_BC = 0

      chi2( 2) = 0.17
      Prob > chi2 = 0.9163
mvmeta command stored as F9; test command stored as F8

```

### 2. Local approach

```

7 . network sidesplit all

```

| Side  | Direct    |           | Indirect  |           | Difference |           |       |  |
|-------|-----------|-----------|-----------|-----------|------------|-----------|-------|--|
|       | Coef.     | Std. Err. | Coef.     | Std. Err. | Coef.      | Std. Err. | P> z  |  |
| B C * | -1.167121 | .3997071  | -1.174295 | 1.246857  | .0071746   | 1.267316  | 0.995 |  |
| A B * | .865075   | .2644586  | 1.50346   | 1.569214  | -.6383855  | 1.581613  | 0.686 |  |
| A C   | -.1720447 | .687635   | -.3695049 | .5749717  | .1974602   | .8874279  | 0.824 |  |

```

* Warning: all the evidence about these contrasts comes from the trials which dir
> ectly compare them.
See help file for more information.

```

Figure S5. Funnel plot of included studies. A, placebo; B, multiple doses; C, single dose.

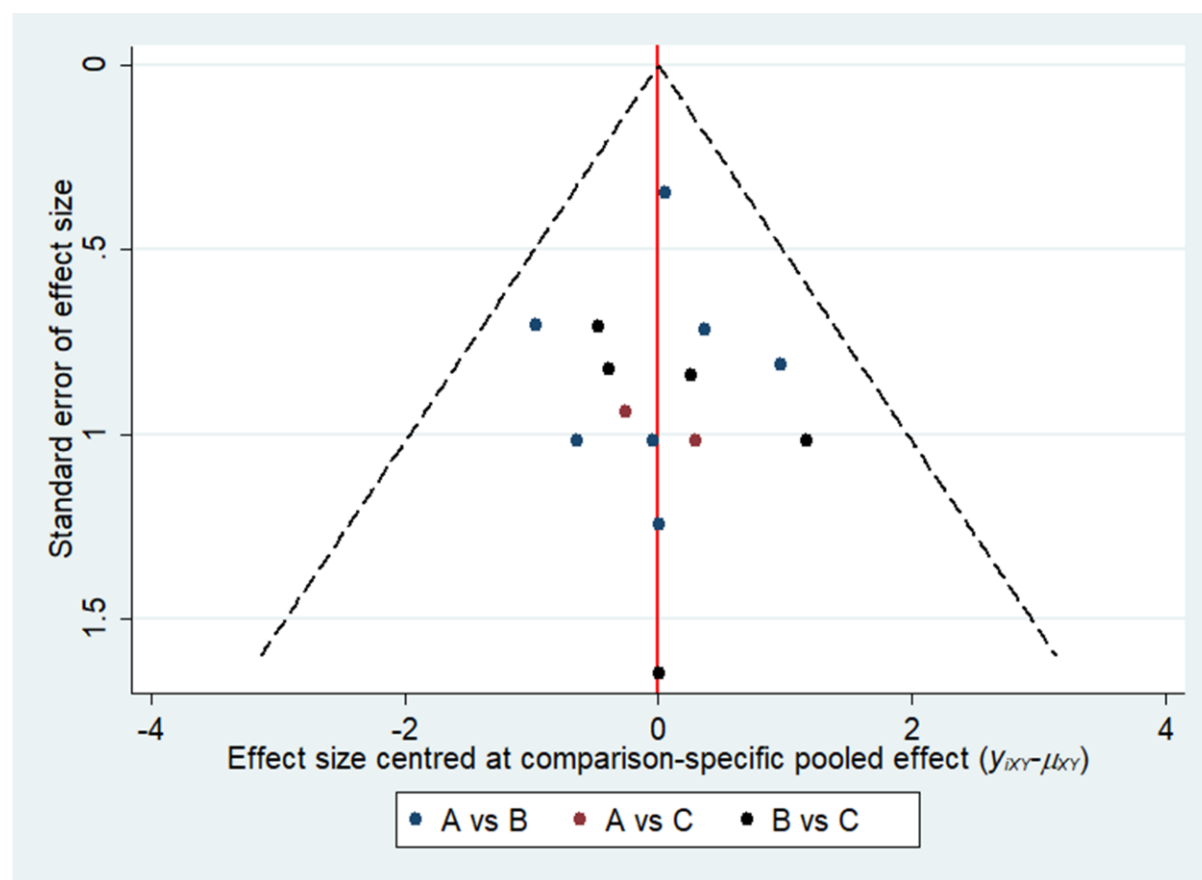

Supplement: s1 [file s1]
